# Supplementary material for: Therapeutic targeting of pancreatic cancer stem cells by dexamethasone modulation of the MKP-1–JNK axis
Source: PubMed Central journal article supplement (PMC7939393; doi:10.1074/jbc.ra120.015223), 2021-01-13
Supplement: mmc1.pdf [file mmc1.pdf]

## Supporting Information

### **Therapeutic targeting of pancreatic cancer stem cells by dexamethasone modulation of the MKP-1 - JNK axis**

Shuhei Suzuki<sup>1,2,6</sup>, Masashi Okada<sup>1,6</sup>, Tomomi Sanomachi<sup>1,2</sup>, Keita Togashi<sup>1,3</sup>, Shizuka Seino<sup>1</sup>,  
Atsushi Sato<sup>4</sup>, Masahiro Yamamoto<sup>1</sup>, Chifumi Kitanaka<sup>1,5</sup>

Departments of<sup>1</sup>Molecular Cancer Science, <sup>2</sup>Clinical Oncology, <sup>3</sup>Ophthalmology and Visual  
Sciences, and <sup>4</sup>Neurosurgery, Yamagata University School of Medicine, Yamagata, 990-9585,  
Japan

<sup>5</sup>Research Institute for Promotion of Medical Sciences, Yamagata University Faculty of  
Medicine, Yamagata, 990-9585, Japan

Running title: GR-MKP-1 -JNK axis in pancreatic cancer stem cells

#### Contents:

Supporting Figures S1-S12

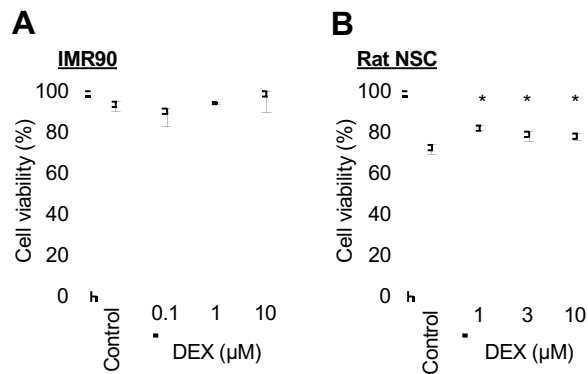

**Supporting Figure S1. Dexamethasone effects on non-cancer cell viability.** IMR90 human fetal lung fibroblasts (**A**) and rat cortical neural stem cells (Rat NSC) (**B**) either treated with DEX at the indicated concentrations or left untreated (Control) for six days were stained with trypan blue to determine cell viability. Data are shown as means  $\pm$  standard deviation from triplicate samples of a representative experiment repeated with similar results. \* $p < 0.05$  (compared with control).

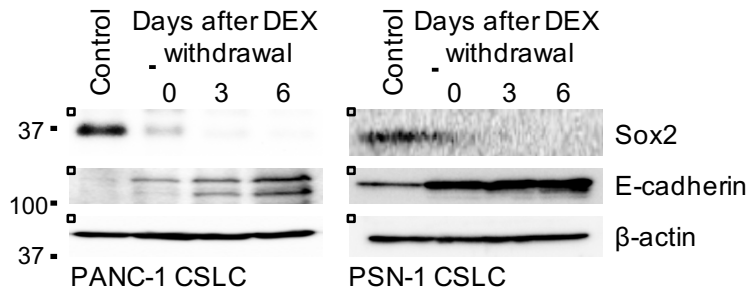

**Supporting Figure S2. Dexamethasone-induced changes in differentiation and stem cell marker expression in pancreatic CSCs persist even after dexamethasone withdrawal.** Cells maintained in either the presence or absence of 1  $\mu$ M DEX for six days were subsequently cultured in DEX-free medium for the indicated time periods. Indicated proteins were detected by immunoblotting.

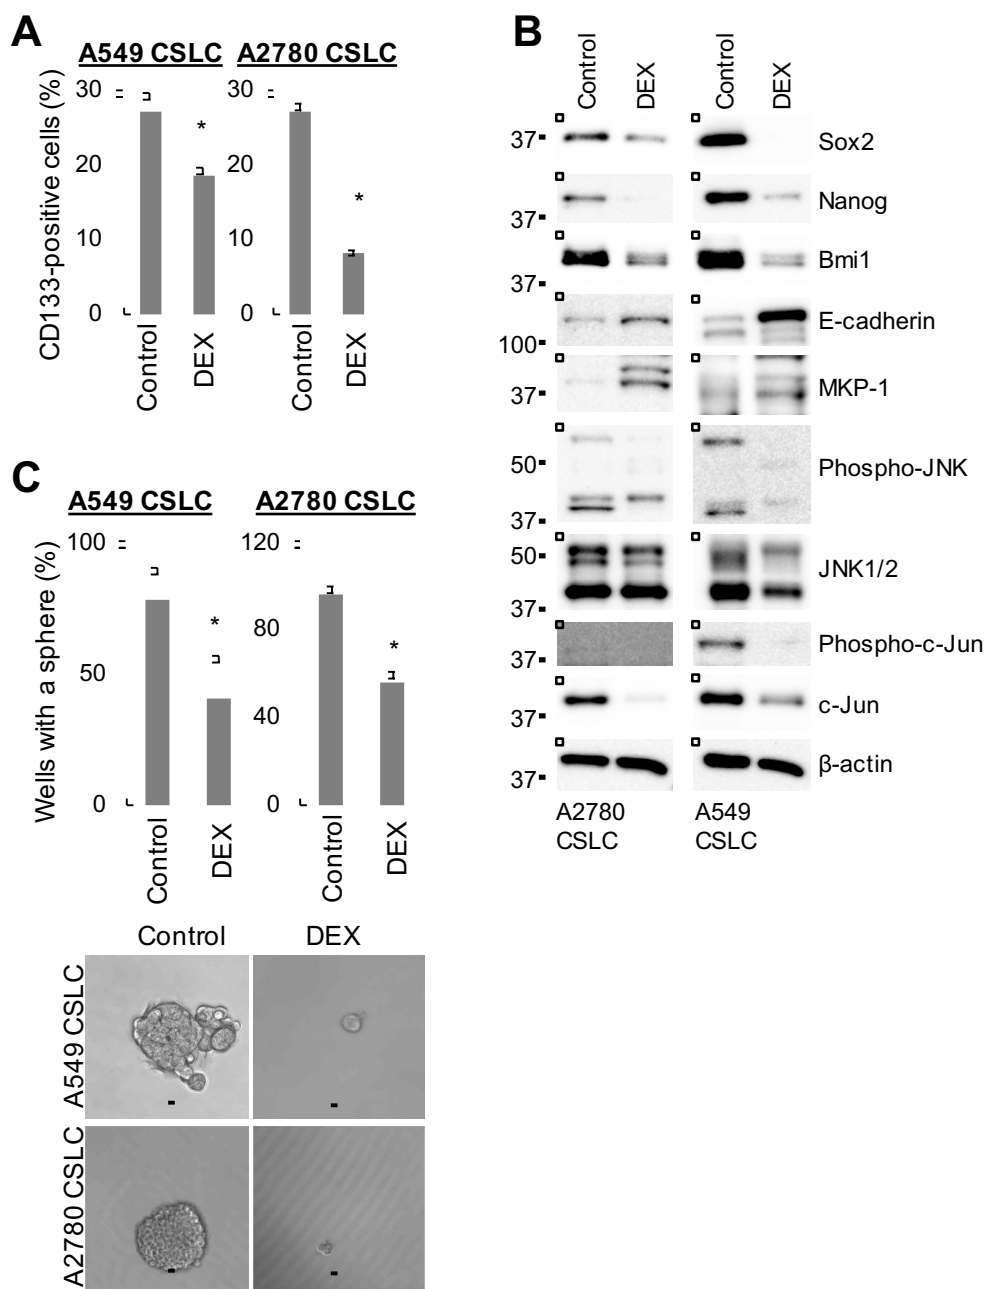

**Supporting Figure S3. Dexamethasone promotes differentiation and loss of stemness in lung and ovarian CSCs.** *A*, A549 CSLC (non-small cell lung cancer) and A2780 CSLC (ovarian cancer) human cancer stem cells cultured either with 1  $\mu$ M DEX or without drug (Control) for six days were subjected to flow cytometry to detect cell-surface expression of CD133; percentage of CD133-positive cells was determined. Data are shown as mean  $\pm$

standard deviation (SD) from three independent experiments ( $*p < 0.05$ ). **B** and **C**, Cells cultured as described in (**A**) were subjected to either immunoblotting for indicated proteins (**B**) or to a sphere formation assay in the absence of DEX (**C**). **C**, Percentage of wells in which a sphere formed from a single cell is shown (*Top*). Data are shown as mean  $\pm$  SD from three independent experiments.  $*p < 0.05$ . *Bottom*, photomicrographs of representative wells. Scale bars, 200  $\mu\text{m}$ .

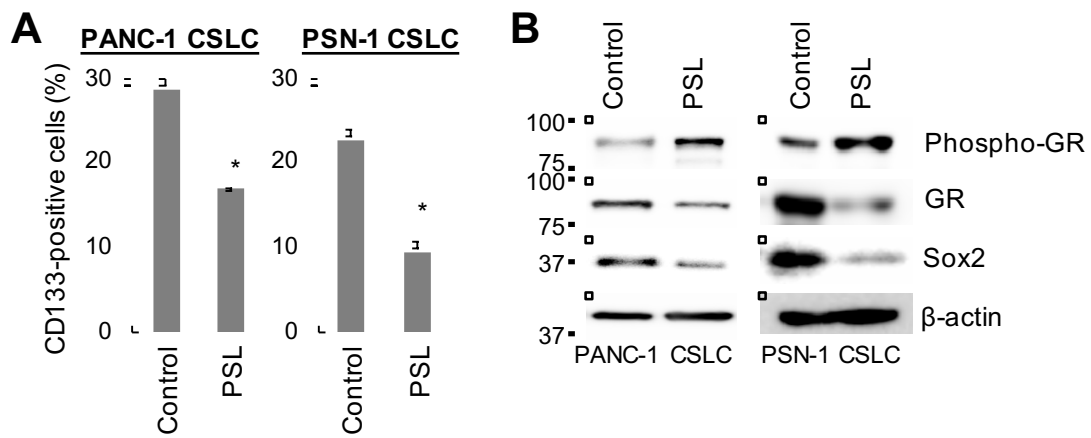

**Supporting Figure S4. Prednisolone activates glucocorticoid receptor and promotes loss of stemness in pancreatic CSCs.** *A*, Cells cultured either with 1  $\mu$ M prednisolone (PSL) or without PSL (Control) for six days were subjected to flow cytometry to detect cell-surface expression of CD133; percentage of CD133-positive cells was determined. Data are shown as mean  $\pm$  standard deviation from three independent experiments. \* $p < 0.05$ . *B*, Cells cultured as described in (*A*) were subjected to immunoblotting for the indicated proteins. GR: glucocorticoid receptor.

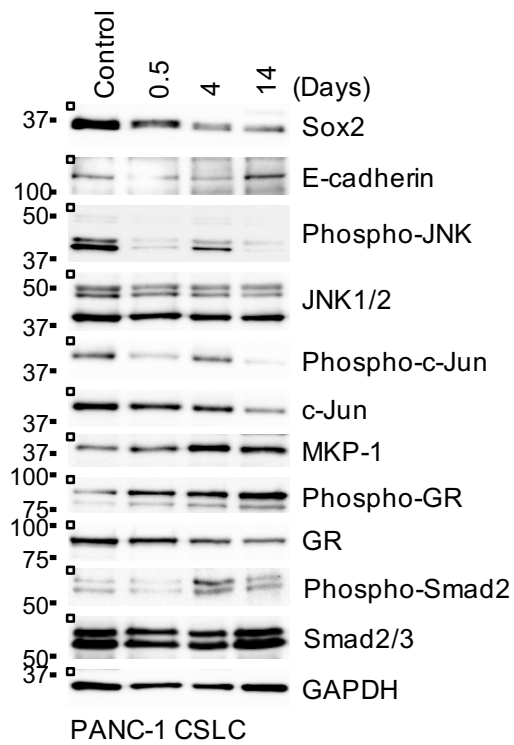

**Supporting Figure S5. Multi-phasic change in JNK pathway activity after dexamethasone treatment.** PANC-1 CSLC cells were cultured either with 1  $\mu$ M DEX for indicated times, or without DEX (Control) for 14 days. Indicated proteins were detected by immunoblotting. GR: glucocorticoid receptor.

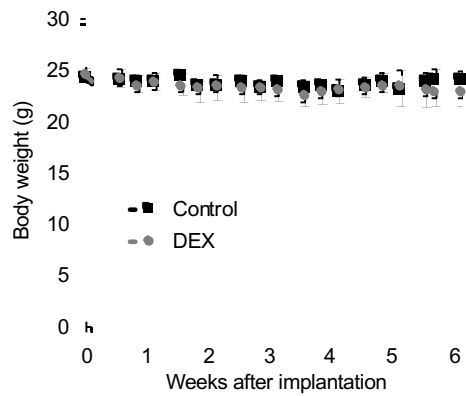

**Supporting Figure S6. The effect of systemic dexamethasone administration on mouse**

**body weight.** Two groups of mice (n = 5 per group) were injected intraperitoneally with either vehicle only or 1 mg/kg DEX three times a week. Mouse body weight was measured at indicated time points. Data are shown as mean  $\pm$  standard deviation for each treatment group.



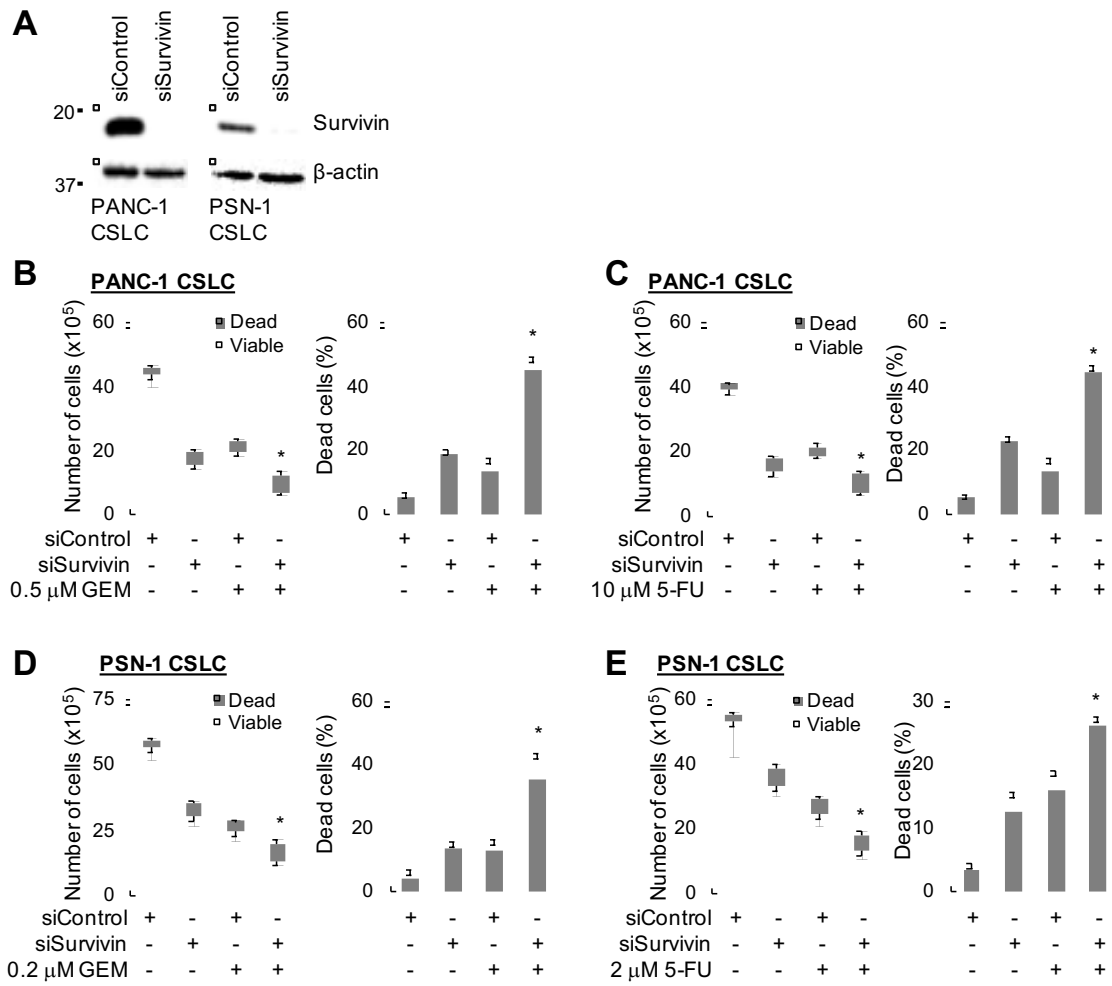

**Supporting Figure S7. Role of survivin expression in chemoresistance of pancreatic CSCs.**

*A*, Survivin levels were determined by immunoblotting in cells transiently transfected with either an siRNA against survivin (siSurvivin) or a control RNA (siControl). PANC-1 CSCLC (*B*, *C*) and PSN-1 CSCLC (*D*, *E*) cells transiently transfected with either siSurvivin or siControl were either treated on the day with the indicated concentrations of GEM or 5-FU or left untreated for three days. *Left*, Viable and dead cell numbers and *Right*, percentage of dead cells were determined by trypan blue staining. Data are shown as mean ± standard deviation from triplicate samples of a representative experiment. \* $p < 0.05$ .

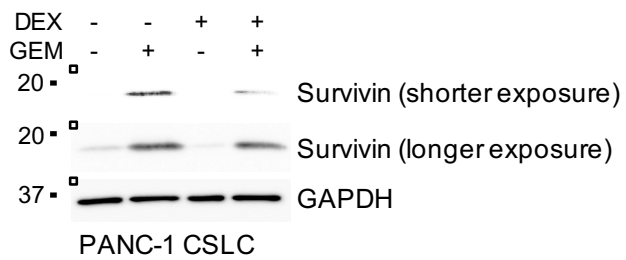

**Supporting Figure S8. The effect of dexamethasone pretreatment on gemcitabine-induced survivin expression in pancreatic CSCs.** PANC-1 CSLC cells pretreated with or without DEX (1  $\mu$ M) for 6 days were treated with or without GEM (1  $\mu$ M) for 3 days in the absence of DEX. Cells were then subjected to immunoblotting for survivin expression. The longer exposure panel is presented to show that the basal level of survivin expression is inhibited by DEX pretreatment.

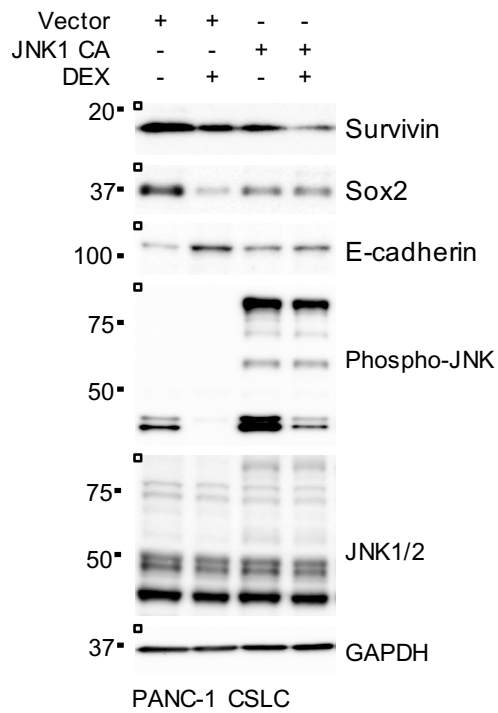

**Supporting Figure S9. Forced JNK1 activation fails to prevent dexamethasone inhibition**

**of survivin expression.** PANC-1 CSLC cells transiently transfected with activated JNK1

protein expression plasmid (JNK1 CA) or with empty control vector (Vector) for 24 h were

either treated with 1  $\mu$ M DEX or left untreated for six days. Indicated proteins were detected by

immunoblotting.

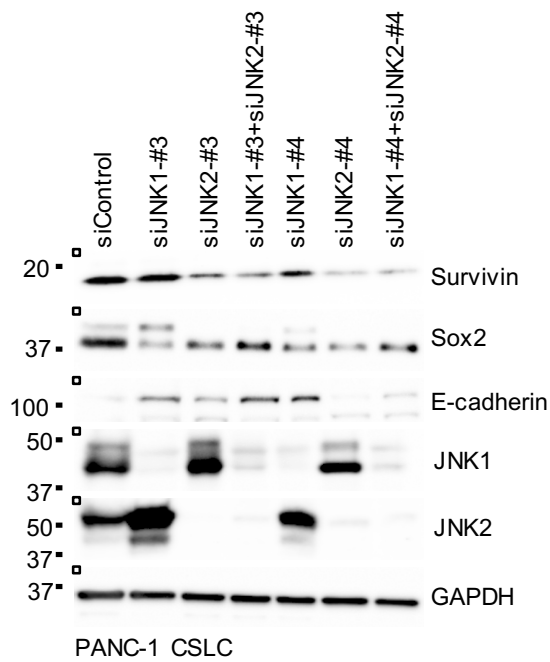

**Supporting Figure S10. Differential requirement for JNK1 and JNK2 in the maintenance of stemness and survivin expression in pancreatic CSCs.** PANC-1 CSLC cells were transiently transfected either with siRNA(s) against JNK1, JNK2, or both, or with a control RNA (siControl) for four days. Indicated proteins were detected by immunoblotting.



## Supporting Figure S12

Fig1B

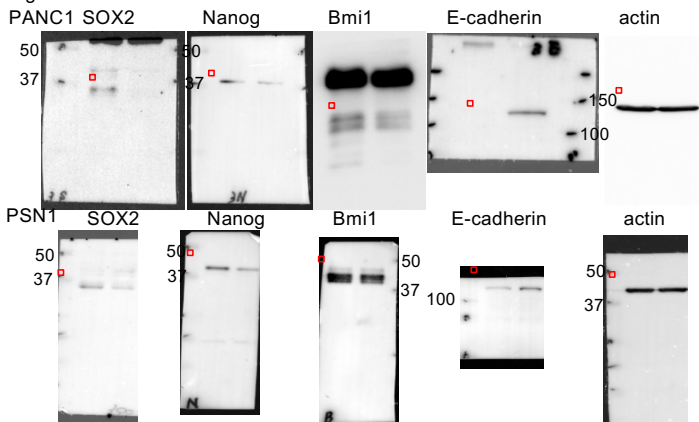

Fig2A

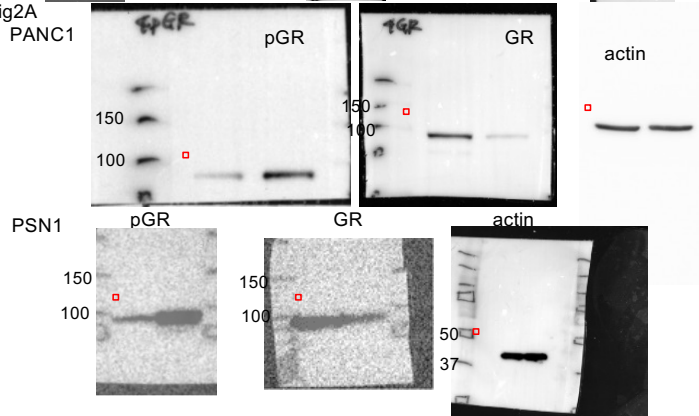

Fig2B

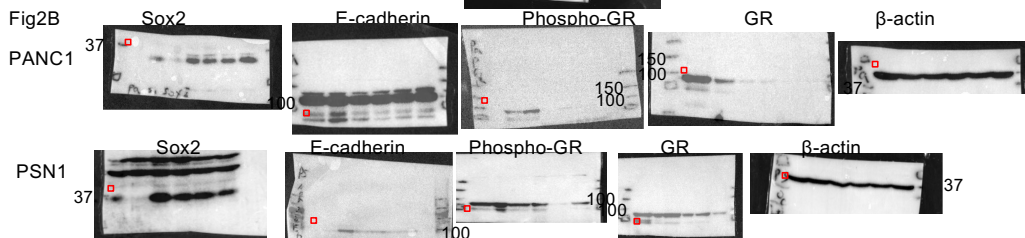

## Supporting Figure S12 (continued)

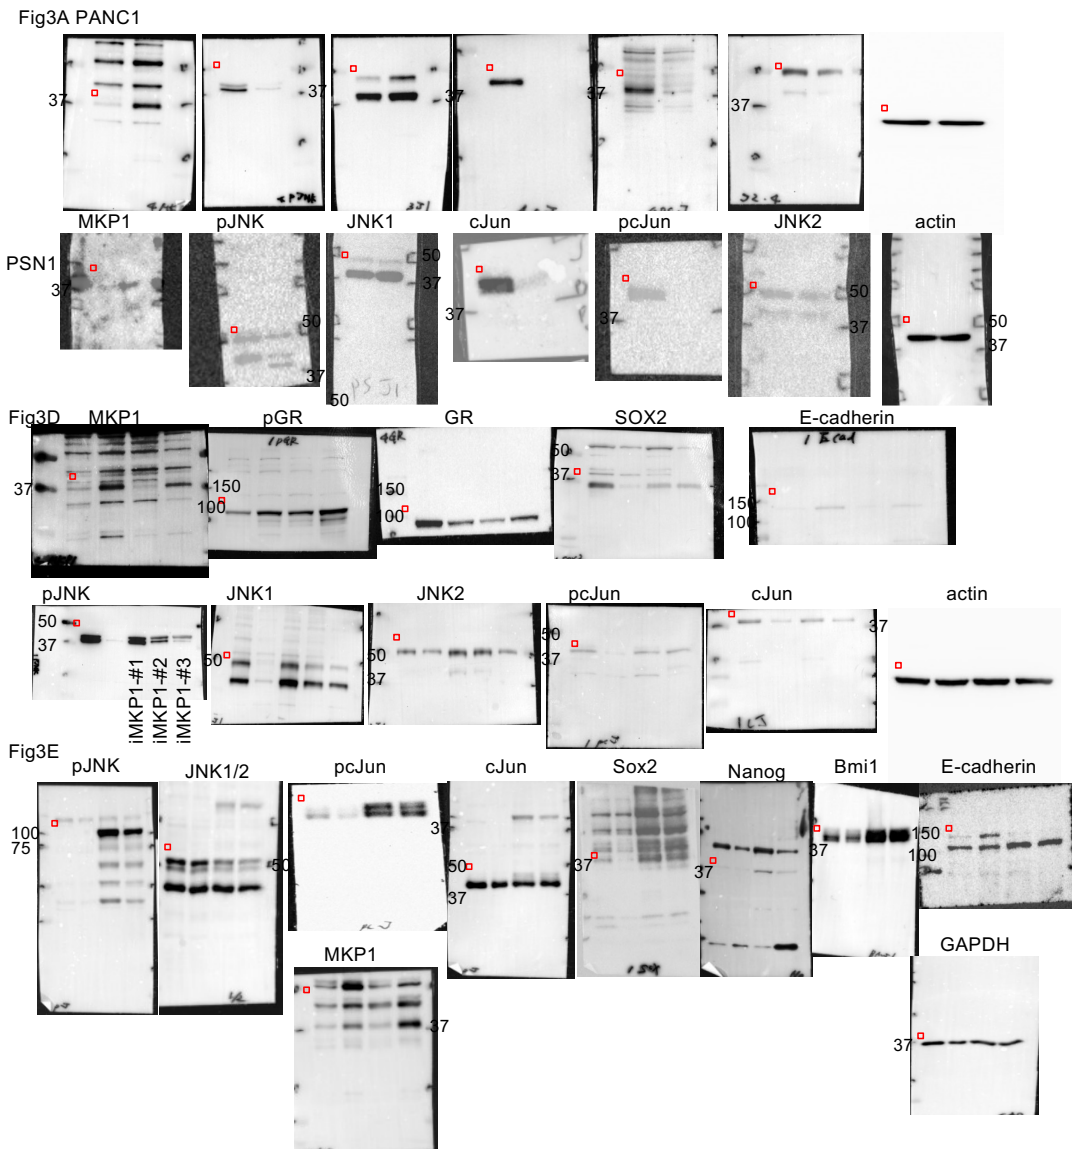

## Supporting Figure S12 (continued)

Fig4B

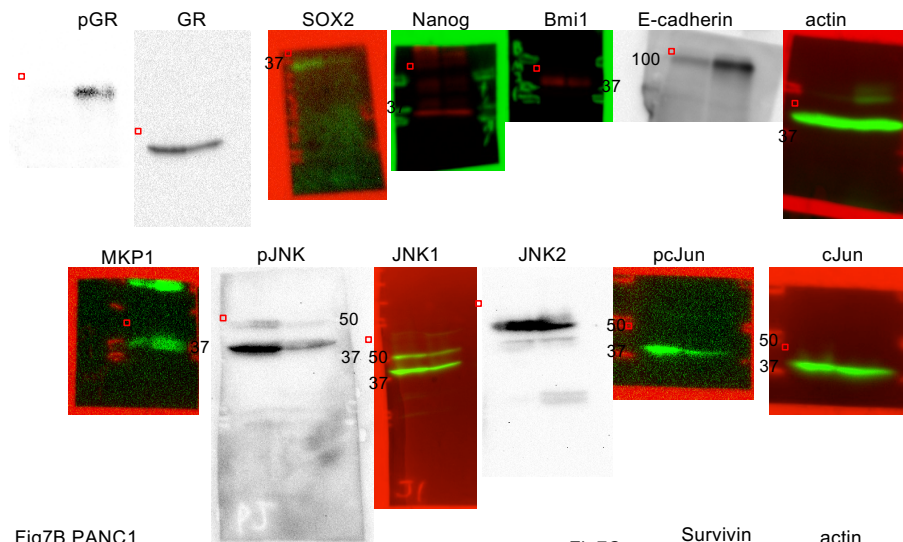

Fig7B PANC1

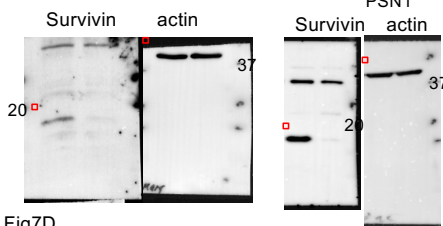

Fig7C

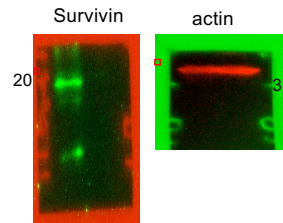

Fig7D

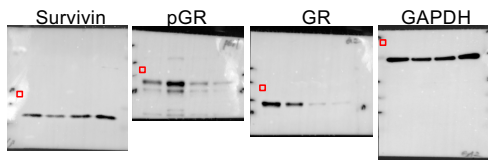

Fig7E

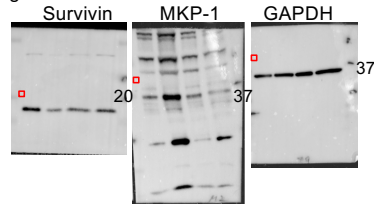

Fig7F PANC1

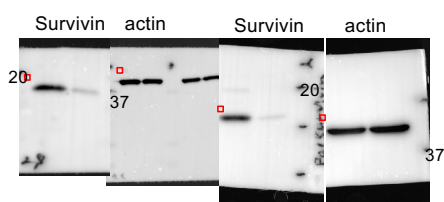

Fig7F PSN1

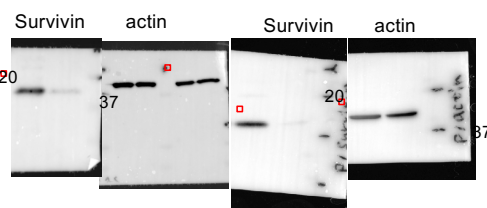



## Supporting Figure S12 (continued)

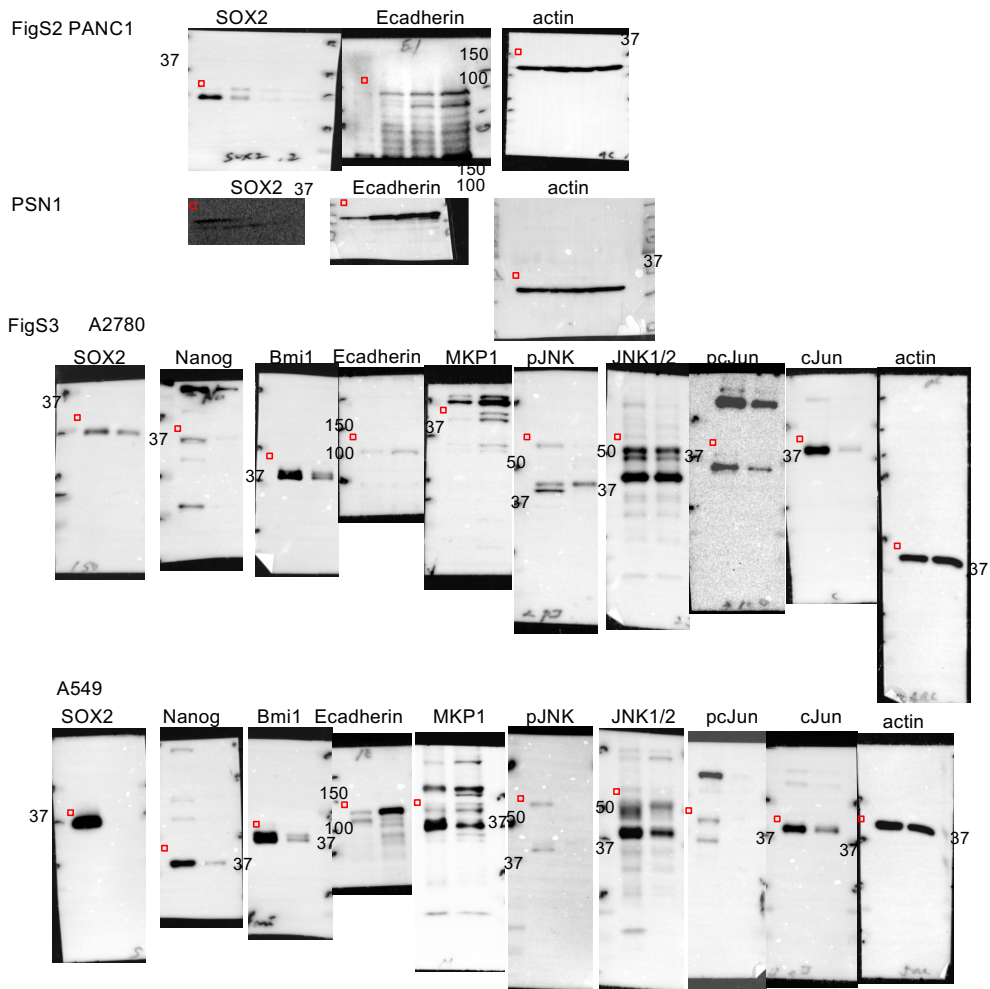

### Supporting Figure S12 (continued)

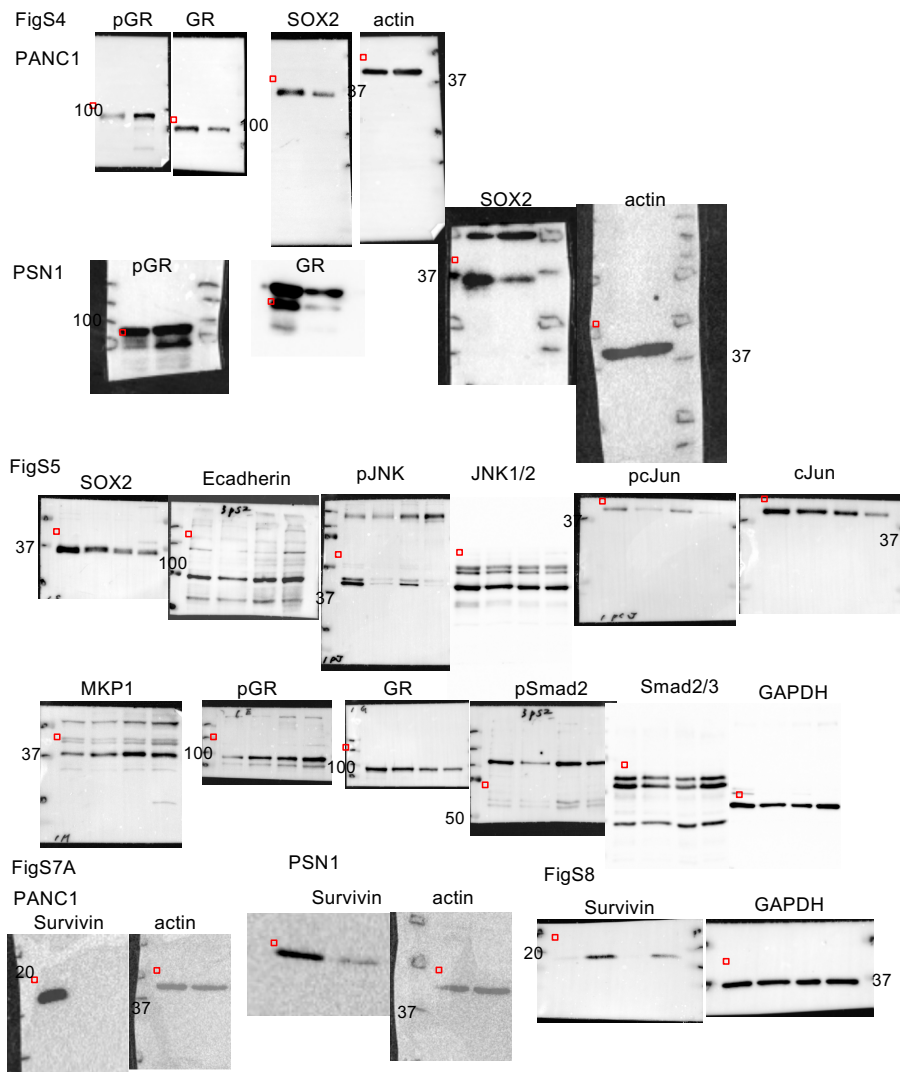

## Supporting Figure S12 (continued)

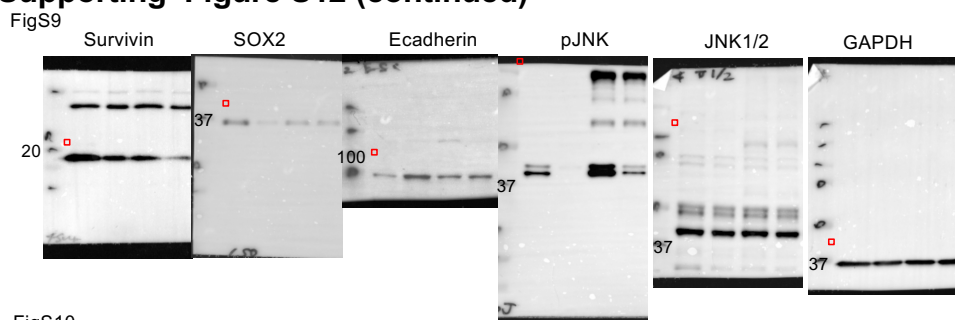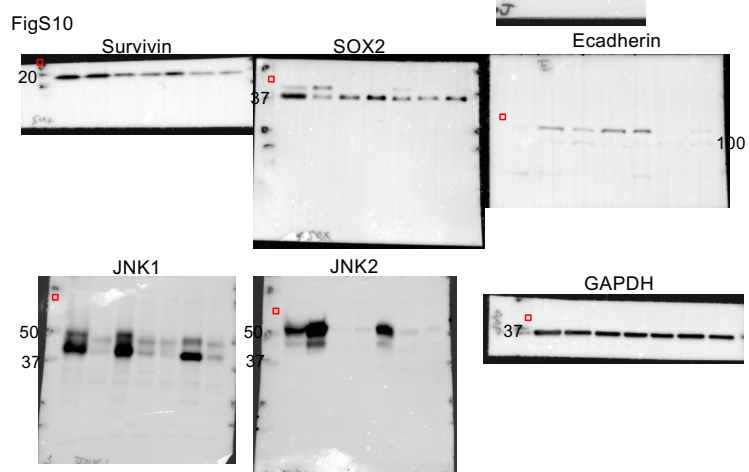

**Supporting Figure S12. Unprocessed immunoblots.** Unprocessed immunoblot images for Figs. 1B, 2A, 2B, 3A, 3D, 3E, 4B, 7B, 7C, 7D, 7E, 7F and for Supporting Figs. S2, S3, S4, S5, S7, S8, S9 and S10 are shown.
